# Supplementary material
Source: publisher figshare collection journal article supplement (https://acs.figshare.com/ndownloader/files/5812671)
Supplement: Supplementary file 1 [file 5812671]

Recent Reviews. 52

compiled by Veronica M. Cornel 

Department of Chemistry, Reedley College, 22288 Hogan Ave, Reedley, CA93654

	Reviews are listed in order of appearance in the sources indicated.  In multidisciplinary review journals, only those reviews which fall within the scope of this Journal are included.  Sources are listed alphabetically in three categories: regularly issued review journals and series volumes, contributed volumes, and other monographs. Titles are numbered serially, and these numbers are used for reference in the index.

	Major English-language sources of critical reviews are covered.  Encyclopedic treatises, annual surveys such as Specialist Periodical Reports, and compilations of symposia proceedings are omitted.

	This installment of Recent Reviews covers principally the latter part of the 1998 literature. Previous installment: J. Org. Chem. 1999, 64(1), 316-26.

	These Recent Review articles are now also available in a database form on the ACS Organic Division WWW site http://www.chem.unt.edu/acs/

Regularly Issued Journals and Series Volumes

Accounts of Chemical Research

	1.	Gruebele, M.; Sabelko, J.; Ballew, R.; Ervin, J. Laser Temperature Jump Induced Protein Refolding. 1998, 31(11), 699-707.
	2.	Dyer, R. B.; Gai, F.; Woodruff, W. H.; Gilmanshin, R.; Callender, R. H. Infrared Studies of Fast Events in Protein Folding. 1998, 31(11), 709-16.
	3.	Oliveberg, M. Alternative Explanations for "Multistate" Kinetics in Protein Folding: Transient Aggregation and Changing Transition-State Ensembles. 1998, 31(11), 765-72.
	4.	Menger, F. M.; Angelova, M. I. Giant Vesicles: Imitating the Cytological Processes of Cell Membranes. 1998, 31(12), 789-97.
	5.	Hartwig, J. F. Carbon-Heteroatom Bond-Forming Reductive Eliminations of Amines, Ethers, and Sulfides. 1998, 31(12), 852-60.
	6.	O'Brien, D. F.; Armitage, B.; Benedicto, A.; Bennett, D. E.; Lamparski, H. G.; Lee, Y.-S.; Srisiri, W.; Sisson, T. M. Polymerization of Preformed Self-Organized Assemblies. 1998, 31(12), 861-8.

Angewandte Chemie, International Edition in English

	7.	Corey, E. J.; Helal, C. J. Reduction of Carbonyl Compounds with Chiral Oxazaborolidine Catalysts: A New Paradigm for Enantioselective Catalysis and a Powerful New Synthetic Method. 1998, 37(15), 1987-2012.
	8.	Nicolaou, K. C.; Roschangar, F.; Vourloumis, D. Chemical Biology of Epothilones. 1998, 37(15), 2015-45.
	9.	Hartwig, J. F. Transition Metal Catalyzed Synthesis of Arylamines and Aryl Ethers from Aryl Halides and Triflates: Scope and Mechanism. 1998, 37(15), 2047-67.
	10.	Bewley, C. A.; Faulkner, D. J. Lithistid Sponges: Star Performers or Hosts to the Stars. 1998, 37(16), 2163-78.
	11.	Stahl, S. S.; Labinger, J. A.; Bercaw, J. E. Homogeneous Oxidation of Alkanes by Electrophilic Late Transition Metals. 1998, 37(16), 2181-92.
	12.	Boyer, P. D. Energy, Life, and ATP Nobel Lecture. 1998, 37(17), 2297-307.
	13.	Walker, J. E. ATP Synthesis by Rotary Catalysis Nobel Lecture. 1998, 37(17), 2309-19.
	14.	Homann, K. H. Fullerenes and Soot Formation - New Pathways to Large Particles in Flames. 1998, 37(18), 2435-51.
	15.	Renaud, P.; Gerster, M. Use of Lewis Acids in Free Radical Reactions. 1998, 37(19), 2563-79.
	16.	Lucet, D.; LeGall, T.; Mioskowski, C. The Chemistry of Vicinal Diamines. 1998, 37(19), 2581-627.
	17.	Uhlmann, E.; Peyman, A.; Breipohl, G.; Will, D. W. PNA: Synthetic Polyamide Nucleic Acids with Unusual Binding Properties. 1998, 37(20), 2797-823.
	18.	Girard, C.; Kagan, H. B. Nonlinear Effects in Asymmetric Synthesis and Stereoselective Reactions: Ten Years of Investigation. 1998, 37(21), 2923-59.
	19.	Seeman, N. C. Nucleic Acid Nanostructures and Topology. 1998, 37(23), 3220-38.
	20.	Carpenter, B. K. Dynamic Behavior of Organic Reactive Intermediates. 1998, 37(24), 3341-50.
	21.	Liu, D. R.; Schultz, P. G. Generating New Molecular Function: A Lesson from Nature. 1999, 38(1-2), 36-54.
	22.	Ying, J. Y.; Mehnert, C. P.; Wong, M. S. Synthesis and Applications of Supramolecular-Templated Mesoporous Materials. 1999, 38(1-2), 56-77.
	23.	Papageorgiou, V. P.; Assimopoulou, A. N.; Couladouros, E. A.; Hepworth, D.; Nicolaou, K. C. The Chemistry and Biology of Alkannin, Shikonin, and Related Naphthazarin Natural Products. 1999, 38(3), 270-301.
	24.	Britovsek, G. J. P.; Gibson, V. C.; Wass, D. F. The Search for New-Generation Olefin Polymerization Catalysts: Life beyond Metallocenes. 1999, 38(4), 428-47.
	25.	Boger, D. L.; Cai, H. Bleomycin: Synthetic and Mechanistic Studies. 1999, 38(4), 448-76.

Chemical Reviews

	26.	Avalos, M.; Babiano, R.; Cintas, P.; Jimenez, J. L.; Palacios, J. C.; Barron, L. D. Absolute Asymmetric Synthesis under Physical Fields: Facts and Fictions. 1998, 98(7), 2391-404.
	27.	Martin, N.; Sanchez, L.; Illescas, B.; Perez, I. C60-Based Electroactive Organofullerenes. 1998, 98(7), 2527-47.
	28.	Naota, T.; Takaya, H.; Murahashi, S.-I. Ruthenium-Catalyzed Reactions for Organic Synthesis. 1998, 98(7), 2599-660.
	29.	Bruce, M. I. Transition Metal Complexes Containing Allenylidene, Cumulenylidene, and Related Ligands. 1998, 98(8),  2797-858.
	30.	Kozubek, A.; Tyman, J. H. P. Resorcinolic Lipids, the Natural Non-Isoprenoid Phenolic Amphiphiles and Their Biological Activity. 1999, 99(1), 1-25.
	31.	Filippini, M.-H.; Rodriguez, J. Synthesis of Functionalized Bicyclo[3.2.1]octanes and Their Multiple Uses in Organic Chemistry. 1999, 99(1), 27-76.
	32.	Jessop, P. G.; Ikariya, T.; Noyori, R. Homogeneous Catalysis in Supercritical Fluids. 1999, 99(2), 475-93.
	33.	Savage, P. E. Organic Chemical Reactions in Supercritical Water 1999, 99(2), 603-21.

Chemistry and Industry

	34.	Quy, A. Saving our Polyesterdays: Historical Plastics Conservation. 1998, (15), 599-603.
	35.	Zimmerman, N.; Moore, J.; Zimmerman, S. Polymer Chemistry Comes Full Circle. 1998, (15), 604-10.
	36.	Wess, L. Biotechnology: A Hive of Bio Industry. 1998, (16), 638-9.
	37.	Beaumier, P. L.; Breitz, H. B. Designer Labels in Cancer Treatment. 1998, (18), 734-7.
	38.	Pandey, R. K.; Herman, C. K. Shedding Some Light on Tumors. 1998, (18), 739-43.
	39.	Tapolczay, D. J.; Kobylecki, R. J.; Payne, L. J.; Hall, B. Extracting Order from Chaos. 1998, (19), 772-5.
	40.	Asaro, M. F.; Wilson, R. B., Jr. The Screen Test. 1998, (19), 777-80.
	41.	Persidis, A. A Business to Bank On. 1998, (19), 782-4.
	42.	Brown, R. D.; Newsam, J. M. The Importance of Model Behavior. 1998, (19), 785-8.
	43.	Jandeleit, B.; Weinberg, W. H. Putting Catalysis on the Fast Track. 1998, (19), 795-8.
	44.	Mattson, M. P. Answering the Old Age Question. 1998, (20), 843-8.
	45.	Carlin, J. Waste Not Want Not? 1998, (22), 922-5.
	46.	Houghton, P. J. Roots of Remedies: Plants, People and Pharmaceuticals. 1999, (1), 15-9.
	47.	Jaspars, M. Testing the Waters. 1999, (2), 51-5.
	48.	Buchholz, F. L. Absorbing Work for Smart Polymers. 1999, (2), 56-7, 61-3.

Chemistry in Britain

	49.	Milgrom, L.; MacRobert, S. Light Years Ahead. 1998, 34(5), 45-50.
	50.	Lee, M. Polymers and Processes. 1998, 34(9), 22-5.
	51.	Stevenson, R. Gold Standard for Drugs. 1998, 34(9), 31-5.
	52.	Hart, T. Rapid Responses. 1998, 34(10), 47-9.

Chemical Society Reviews

	53.	Kobayashi, S. New Methodologies for the Synthesis of Compound Libraries. 1999, 28(1), 1-15.
	54.	Bickelhaupt, F. Travelling the Organometallic Road: a Wittig Student's Journey from Lithium to Magnesium and Beyond. 1999, 28(1), 17-23.
	55.	Roberts, B. P. Polarity-Reversal Catalysis of Hydrogen-Atom Abstraction Reactions: Concepts and Applications in Organic Chemistry. 1999, 28(1), 25-35.
	56.	Ito, H.; Taguchi, T. Asymmetric Claisen Rearrangement. 1999, 28(1), 43-50.
	57.	Bolm, C.; Muniz, K. Planar Chiral Arene Chromium(0) Complexes: Potential Ligands for Asymmetric Catalysis. 1999, 28(1), 51-9.
	58.	Knapp, S. The Tethered Nitrogen in Natural Products Synthesis. 1999, 28(1), 61-72.

CHEMTECH

	59.	Wulff, G. Fitting Molecules into Polymeric Receptors. 1998, 28(11), 19-26.
	60.	Huffman, G. P.; Shah, N. Can Waste Plastics and Tires be Recycled Economically? 1998, 28(12), 34-43.
	61.	Lu, G. Q.; Wang, S. Ni-Based Catalysts for Carbon Dioxide Reforming of Methane. 1999, 29(1), 37-43.

Coordination Chemistry Reviews

	62.	Collin, J.; Giuseppone, N.; Van de Weghe, P. Lanthanide Iodides, A New Family of Efficient Lewis Acids Catalysts. 1998, 178-9(1), 117-44.
	63.	Touchard, D.; Dixneuf, P. H. A New Class of Carbon-Rich Organometallics. The C-3, C-4 and C-5 Metallacumulenes Ru:(C:)nCR2. 1998, 178-9(1), 405-25.
	64.	Hlatky, G. G. Metallocene Catalysts for Olefin Polymerization. Annual Review for 1996. 1999, 181(1), 243-96.

Journal of Heterocyclic Chemistry

	65.	Kappe, T. Synthesis and Chemistry of Pyridazines Functionalized in Position 3 and 5 with Heteroatoms. 1998, 35(5), 1111-22.

Natural Product Reports

	66.	Beale, M. H.; Ward, J. L. Jasmonates: Key Players in the Plant Defense. 1998, 15(6), 533-48.
	67.	Robins, R. J. The Application of Root Cultures to Problems of Biological Chemistry. 1998, 15(6), 549-70.
	68.	Michael, J. P. Indolizidine and Quinolizidine Alkaloids. 1998, 15(6), 571-94.
	69.	Michael, J. P. Quinoline, Quinazoline and Acridone Alkaloids. 1998, 15(6), 595-606.
	70.	Lie K. J., Marcel, S. F.; Pasha, M. K. Fatty Acids, Fatty Acid Analogs and Their Derivatives. 1998, 15(6), 607-29.
	71.	Harborne, J. B.; Williams, C. A. Anthocyanins and Other Flavonoids. 1998, 15(6), 631-52.
	72.	Brown, G. D. The Biosynthesis of Steroids and Triterpenoids. 1998, 15(6), 653-96.
	73.	Fraga, B. M. Natural Sesquiterpenoids. 1999, 16(1), 21-38.
	74.	Hick, A. J.; Luszniak, M. C.; Pickett, J. A. Volatile Isoprenoids that Control Insect Behavior and Development. 1999, 16(1), 39-54.
	75.	Ann Casteel, D. A. Peroxy Natural Products. 1999, 16(1), 55-73.
	76.	Ward, R. S. Lignans, Neolignans and Related Compounds. 1999, 16(1), 75-96.
	77.	Dewick, P. M. The Biosynthesis of C5-C25 Terpenoid Compounds. 1999, 16(1), 97-130.

Organic Preparations and Procedures International

	78.	Corbett, J. W. Recent Progress in Solid Phase Heterocycle Syntheses. A Review. 1998, 30(5), 489-550.
	79.	Clennan, E. L.; Stensaas, K. L. Recent Progress in the Synthesis, Properties and Reactions of Trisulfanes and Their Oxides. 1998, 30(5), 551-600.
	80.	Akai, S.; Kita, Y. Recent Progress in the Synthesis of p-Quinones and p-Dihydroquinones Through Oxidation of Phenol Derivatives. A Review. 1998, 30(6), 603-29.
	81.	Pozdnev, V. F. Activation of Carboxylic Acids by Pyrocarbonates. Scope and Limitations. A Review. 1998, 30(6), 631-55.
	82.	Vlad, P. F.; Krimer, M. Z. Substituted Glutaconic Acids and Their Esters in Organic Synthesis. A Review. 1998, 30(6), 657-97.

Research on Chemical Intermediates

	83.	Pardasani, R. T.; Pardasani, P.; Muktawat, S.; Ghosh, R.; Mukherjee, T. Photocyclisation of Aroyl-1,4-quinones as Precursors for Anthracyclones and Heteroanthracyclones. 1998, 24(9), 973-8.

Russian Chemical Reviews

	84.	Konstantinovich, K. N. Catalytic Antibodies: Possible Applications in Organic Synthesis. 1998, 67(12), 1099-132.
	85.	Avgustovich, S. M.-G. 2,3,4,5-Tetrahydropyridine (1-Piperideine) and Its Derivatives. Synthesis and Chemical Properties. 1998, 67(12), 1133-63.
	86.	Yakovlevna, M. L.; Nikolaevich, K. V. Interaction of Hydrocarbons with Partial Oxidation Catalysts. 1998, 67(12), 1175-85.
	87.	Nikolaevna, K. L.; Yuvenal'evich, A. M. Cambridge Structural Database as a Research Tool in Essential Principles of Organic Molecular Crystal Packing Investigations. 1999, 68(1), 3-22.
	88.	Valentinovich, K. D.; Nikolaevna, L. R. Donor-Acceptor Complexes and Radical-Ion Salts Based on Fullerenes. 1999, 68(1), 23-44.
	89.	Petrovich, L. V. The Recyclisation Reactions of Carbo- and Heterocycles with Malononitrile and Its Derivatives Participation. 1999, 68(1), 46-60.
	90.	Alexandrovich, T. V.; Gel'evich, K. N. Reductive Amination of Oxygen Containing Organic Compounds. 1999, 68(1), 61-78.
	91.	Vasil'evich, T. B.; Baransky, V. A.; Eliseeva, G. D. Levulinic Acid in Organic Synthesis. 1999, 68(1), 79-93.
	92.	Borisovich, S. A. The Chemistry of Furazans Fused with Six- and Seven-Membered Heterocycles with one Heteroatom. 1999, 68(2), 154-66.
	93.	Yakovlevna, L. E.; Kibardin, A. M. Reactions of Halophosphines with Conjugated Heterodienes. 1999, 68(2), 167-83.

Science

	94.	Braun, P.; Shanklin, J.; Whittle, E.; Somerville, C. Catalytic Plasticity of Fatty Acid Modification Enzymes Underlying Chemical Diversity of Plant Lipids. 1998, 282(5392), 1315-7.
	95.	Harbury, P. B.; Plecs, J. J.; Tidor, B.; Alber, T.; Kimt, P. S. High-Resolution Protein Design with Backbone Freedom. 1998, 282(5393), 1462-7.
	96.	Huang, H.; Chopra, R.; Verdine, G. L.; Harrison, S. C. Structure of a Covalently Trapped Catalytic Complex of HIV-1 Reverse Transcriptase: Implications for Drug Resistance. 1998, 282(5394), 1669-75.
	97.	Akagi, K.; Piao, G.; Kaneko, S.; Sakamaki, K.; Shirakawa, H.; Kyotani, M. Helical Polyacetylene Synthesized with a Chiral Nematic Reaction Field. 1998, 282(5394), 1683-6.
	98.	Lu, H. P.; Xun, L.; Xie, X. S. Single-Molecule Enzymic Dynamics. 1998, 282(5395), 1877-82.
	99.	Kondru, R. K.; Wipf, P.; Beratan, D. N. Atomic Contributions to the Optical Rotation Angle as a Quantitative Probe of Molecular Chirality. 1998, 282(5397), 2247-50.
	100.	Carlezon, W. A., Jr.; Thome, J.; Olson, V. G.; Lane-Ladd, S. B.; Brodkin, E. S.; Hiroi, N.; Duman, R. S.; Neve, R. L.; Nestler, E. J. Regulation of Cocaine Reward by CREB. 1998, 282(5397), 2272-5.
	101.	Harada, A.; Kataoka, K. Chain Length Recognition: Core-Shell Supramolecular Assembly from Oppositely Charged Block Copolymers. 1999, 283(5398), 65-7.
	102.	Ganser, B. K.; Li, S.; Klishko, V. Y.; Finch, J. T. Assembly and Analysis of Conical Models for the HIV-1 Core. 1999, 283(5398), 80-3.
	103.	Jenekhe, S. A.; Chen, X. L. Self-Assembly of Ordered Microporous Materials from Rod-Coil Block Copolymers. 1999, 283(5400), 372-5.
	104.	Kelley, S. O.; Barton, J. K. Electron Transfer Between Bases in Double Helical DNA. 1999, 283(5400), 375-81.
	105.	Zubarev, E. R.; Pralle, M. U.; Li, L.; Stupp, S. I. Conversion of Supramolecular Clusters to Macromolecular Objects. 1999, 283(5401), 523-6.
	106.	Sirota, E. B.; Herhold, A. B. Transient Phase-Induced Nucleation. 1999, 283(5401), 529-32.

Synlett

	107.	Ohno, M.; Yamamoto, Y.; Eguchi, S. Highly Selective Synthesis of Polyfunctionalized Carbo- and Heterocycles Based on Ring Expansion of Squaric Acid Derivatives. 1998, (11), 1167-74.
	108.	Grimme, W.; Bertsch, A.; Flock, H.; Noack, T.; Krauthaeuser, S. Bridged Medium Rings with Hyperstable Double Bonds. Syntheses and Reactions. 1998(11), 1175-81.
	109.	Burrell, A. K.; Officer, D. L. Functionalizing Porphyrins via Wittig Reactions. A Building Block Approach. 1998, (12), 1297-307.
	110.	Jun, C.-H.; Hong, J.-B.; Lee, D.-Y. Chelation-Assisted Hydroacylation. 1999, (1), 1-12.
	111.	Iwasawa, N. Cobalt Carbonyl Induced Transformations of Alkynyl- and Propadienylcyclopropanes. 1999, (1), 13-24.

Synthesis-Stuttgart

	112.	Chanon, M.; Barone, R.; Baralotto, C.; Julliard, M.; Hendrickson, J. B. Information Theory Description of Synthetic Strategies in the Polyquinane Series. The Holosynthon Concept. 1998, (11), 1559-83.
	113.	Dondoni, A. The Thiazole Aldehyde Synthesis. 1998, (12), 1681-706.
	114.	Wessjohann, L. A.; Scheid, G. Recent Advances in Chromium(II)- and Chromium(III)-Mediated Organic Synthesis. 1999, (1), 1-36.

Tetrahedron

	115.	Iseki, K. Catalytic Asymmetric Synthesis of Chiral Fluoroorganic Compounds. 1998, 54(46), 13887-914.
	116.	Iorga, B.; Eymery, F.; Mouries, V.; Savignac, P. Phosphorylated Aldehydes: Preparations and Synthetic Uses. 1998, 54(49), 14637-77.
	117.	Wirth, T. Chiral Selenium Compounds in Organic Synthesis. 1999, 55(1), 1-28.

Topics in Current Chemistry

	118.	Sritana-Anant, Y.; Seiders, T. J.; Siegel, J. S. Design of Novel Aromatics Using the Loschmidt Replacement on Graphs. 1998, 196, 1-43.
	119.	Hagen, S.; Hopf, H. Modern Routes to Extended Aromatic Compounds. 1998, 196, 45-89.
	120.	Konig, B. Carbon Rich Cyclophanes with Unusual Properties - An Update. 1998, 196, 91-136.
	121.	Haag, R.; De Meijere, A. Unsaturated Oligoquinanes and Related Systems. 1998, 196, 137-65.
	122.	Kuck, D. The Centropolyindanes and Related Centro-Fused Polycyclic Organic Compounds. Polycycles Between Neopentane C(CH3)4 and the Carbon Nucleus C(CC3)4. 1998, 196, 167-220.
	123.	Caira, M. R. Crystalline Polymorphism of Organic Compounds. 1998, 198, 163-208.


Contributed Volumes

Advances in Metal-Organic Chemistry. Volume 6. Liebeskind, L. S., Ed.  JAI: Greenwich, Connecticut, 1998.

	124.	Echavarren, A. M.; Castaño, A. Oxa- and Azametallacycles of Nickel: Fundamental Aspects and Synthetic Applications.
	125.	Lautens, M.; Tam, W. Transition-Metal-Catalyzed Cycloaddition Reactions of Bicyclo[2.2.1]hepta-2,5-dienes (Norbornadienes).
126.	Spencer, J.; Pfeffer, M. State-of-the-Art in Selective Hetero- and Carbocyclic Synthesis Mediated by Cyclometallated Complexes.
127.	Liu, R.-S. Synthetic Application of Cyclopentadienyl Molybdenum(II) and Tungsten (II)-Allyl and Diene Compounds in Organic Synthesis.
	128.	Miyaura, N. Synthesis of Biaryls via the Cross-Coupling Reaction of Arylboronic Acids.

Progress in Heterocyclic Chemistry. Volume 10. Gribble, G. W.; Gilchrist, T. L., Eds. Elsevier: Oxford, U.K., 1997.

	129.	Montforts, F.-P.; Glasenapp-Breiling, M. The Synthesis of Chlorins, Bacteriochlorins, Isobacteriochlorins and Higher Reduced Porphyrins.
	130.	Collier, S. J.; Storr, R. C. Heterocyclic ortho-Quinodimethanes


Monographs

	131.	Agrofoglio, L.; Challand, R. Acyclic, Carbocyclic and L-Nucleosides. Blackie: London, U.K., 1998. 
	132.	Alfassi, Z. B. The Chemistry of N-Centered Radicals. Wiley: New York, 1998.
	133.	Atta-ur, R.; Basha, A. Indole Alkaloids. Harwood: Amsterdam, Netherlands, 1997. 
	134.	Barton, D. H. R.; Nakanishi, K., Eds. Comprehensive Natural Products Chemistry. 9 Volumes. Elsevier: Oxford, U.K., 1998.
	135.	Beebe, K. R.; Pell, R. J.; Seasholtz, M. B. Chemometrics: A Practical Guide. Wiley: New York, 1998. 
	136.	Beller, M.; Bolm, C. Transition Metals for Organic Synthesis: Building Blocks and Fine Chemicals, Volume 2. Wiley-VCH: Weinheim, Germany, 1998. 
	137.	Bentley, K. W. Isoquinoline Alkaloids. Harwood: Amsterdam, Netherlands, 1998.
	138.	Braun, T.; Schubert, A.; Schubert, G.; Vasvari, L., Eds. Fullerene Research 1994-1996. World Science: Singapore, 1998.
	139.	Brooks, G. T.; Roberts, T., Eds. Pesticide Chemistry and Bioscience: The Food-Environment Challenge. Royal Society of Chemistry: Cambridge, U.K., 1999.
	140.	Crews, P.; Rodriguez, J.; Jaspers, M. Organic Structure Analysis. Oxford University Press: New York, 1998.
	141.	Davies, G.; Ghabbour, E. A. Humic Substances. Structure, Properties and Uses. The Royal Society of Chemistry: Cambridge, U.K., 1998.
	142.	Dean, J. R. Extraction Methods for Environmental Analysis. Wiley: Chichester, U.K., 1998.
	143.	El Rassi, Z.; Giese, R. W., Eds Selectivity and Optimization in Capillary Electrophoresis. Elsevier: Oxford, U.K., 1997.
144.	Erdik, E. Organozinc Reagents in Organic Synthesis. CRC Press: Boca Raton, Florida, 1996.
	145.	Farina, V.; Krishnamurthy, V.; Scott, W. J. The Stille Reaction. Wiley: New York, 1998. 
	146.	Fulop, F., Ed. Saturated Heterocycles and Beyond: Dedicated to Professor Gabor Bernath on the Occasion of His 65th Birthday. [In: ACH - Models Chem., 1998; 135(4)]. Akad Kiado: Budapest, Hungary, 1998. 
	147.	Gibson, S. E. Transition Metals in Organic Synthesis: A Practical Approach. Oxford University Press: Oxford, U.K., 1997. 
	148.	Green, M., Ed. Organometallic Chemistry. Volume 27. Royal Society of Chemistry: Cambridge, U.K., 1999.
	149.	Gy, P. Sampling for Analytical Purposes. Wiley: Chichester, U.K., 1998. 
	150.	Handley, A, Ed. Extraction Methods in Organic Analysis. CRC Press: Boca Raton, Florida, 1998.
	151.	Haslam, E. Practical Polyphenolics: From Structure to Molecular Recognition and Physiological Action. Cambridge University Press: Cambridge, U.K., 1998. 
	152.	Ho, T.-L., Ed. Organic Synthesis Under Extreme Conditions. World Science: Singapore, 1998.
	153.	Holum, J. R. Fundamentals of General, Organic, and Biological Chemistry. 6th Ed. John Wiley & Sons: New York, 1997.
	154.	Howarth, J. Core Organic Chemistry. Wiley: New York, 1998.
	155.	Hudlicky, T., Ed. Asymmetric Synthesis. [In: Curr. Org. Chem., 1998; 2(3)]. Bentham Science Publishers: Hilversum, Netherlands, 1998.
	156.	Hudlicky, T. Organic Synthesis: Theory and Applications. JAI Press: Stamford, Connecticut, 1998.
	157.	Jinno, K., Ed. Separation of Fullerenes by Liquid Chromatography. Royal Society of Chemistry: Cambridge, U.K., 1999.
	158.	Johnson, W. S. A Fifty-Year Love Affair with Organic Chemistry. American Chemical Society: Washington, D. C., 1998. 
	159.	Jones, W., Ed. Organic Molecular Solids. CRC Press: Boca Raton, Florida, 1997.
	160.	Karsa, D. R., Ed. New Products and Applications in Surfactant Technology. CRC: Boca Raton, Florida, 1998.
	161.	Katz, E.; Eksteen, R.; Schoenmakers, P.; Miller, N., Eds. Handbook of HPLC. [In: Chromatogr. Sci. Ser., 1998; 78]. Marcel Dekker: New York, 1998. 
	162.	Laue, T.; Plagens, A. Named Organic Reactions. Wiley: New York, 1998.
	163.	Lehman, J. W. Operational Organic Chemistry, 3rd Ed. Prentice Hall: Englewood Cliffs, NJ, 1998. 
	164.	Lide, D. R., Jr., Ed. Handbook of Organic Solvents. CRC Press: Boca Raton, Florida, 1995.
	165.	Lunn, G.; Hellwig, L.; Cecchini, A. Handbook of Derivatization Reactions of HPLC. Wiley: New York, 1998.
	166.	McMaster, M.; McMaster, C. GC/MS: A Practical User's Guide. Wiley-VCH: New York, 1998. 
	167.	Monk, M. S. The Viologens: Physicochemical Properties, Synthesis and Application of the Salts of 4,4'-Bipyridine. Wiley: New York, 1998.
	168.	Niessen, W. M. A. Liquid Chromatography-Mass Spectrometry, 2nd Ed., Revised and Expanded. [In: Chromatogr. Sci. Ser., 1999; 79]. Dekker: New York, 1999.
	169.	Nishio, M.; Hirota, M.; Umezawa, Y. CH/ Interaction: Evidence, Nature, and Consequences. Wiley-VCH: New York, 1998. 
	170.	Olah, G. A.; Laali, K. K.; Wang, Q.; Prakash, S. Onium Ions. Wiley: New York, 1998.
	171.	Olah, G. A.; Sommer, J., Eds. Superacid Catalysis. [In: Top. Catal., 1998; 6(1-4)]. Baltzer: Bussum, Netherlands, 1998. 
	172.	Paquette, L. A., Ed. Organic Reactions. Volume 53. Wiley: New York, 1998.
	173.	Procter, G. Stereoselectivity in Organic Synthesis. Oxford University Press: Oxford, U.K., 1998.
	174.	Pybus, D. H.; Sell, C. S. The Chemistry of Fragrances. Royal Society of Chemistry: Cambridge, U.K., 1999.
	175.	Rappoport, Z.; Stang, P. J., Eds. Dicoordinated Carbocations. Wiley: Chichester, U.K., 1997.
	176.	Robyt, J. F. Essentials of Carbohydrate Chemistry. Springer: Berlin, Germany, 1998.
	177.	Smith, R. M.; Hawthorne, S. B., Eds. Supercritical Fluids in Chromatography and Extraction. Elsevier: Oxford, U.K., 1997. 
	178.	Snyder, C. H. The Extraordinary Chemistry of Ordinary Things. 3rd Ed. John Wiley: New York, 1997.
	179.	Staab, H. A.; Bauer, H.; Schneider, K. M. Azolides in Organic Synthesis and Biochemistry. Wiley: New York, 1998.
	180.	Stevens, M. P. Polymer Chemistry. An Introduction. Oxford University Press: New York, 1999.
	181.	Trombini, C.; Di Furia, F.; Riccio, R.; Cozzi, F.; Casiraghi, G., Eds. Seminars in Organic Synthesis. Volume 7. Italian Chemical Society, Rome, Italy, 1997.
	182.	Wasserman, H. H.; Wong, C.-H. Tetrahedron Prize for Creativity in Organic Chemistry. [In: Bioorg. Med. Chem., 1998; 6(8)]. Elsevier: Oxford, U.K., 1998.
	183.	Wilson, S.; Czarnik, A. W. Combinatorial Chemistry: Synthesis and Application. Wiley: New York, 1997. 
	184.	Zirngibl, L. Azoles - Antifungal Active Substances - Syntheses and Uses. Wiley: New York, 1998.

INDEX

Acridone alkaloids, 69
Acylmetal hydrides, 110
Aldehydes, from thiazoles, 113
phosphorylated, 116
Alicyclics, functionalized pyridazines, 65
	oligoquinanes, 121
Alkaloids, acridone, 69
	book, 134
	indole, book, 133
	indolizidine, 68
	isoquinoline, book, 137
	quinazoline, 69
	quinoline, 69
	quinolizidine, 68
Alkanes, oxidation, 11
	supercooled, 106
Alkenes, polymerization, 24
Alkylphenol ethoxylates, book, 160
Alkynylcyclopropanes, 111
Allenylidene, transition metal complex, 29
Alycyclics, with hyperstable double bonds, 108
Amination, 9
	reductive, 90
Amines, reductive elimination, 5
Amino group, tethered nitrogen, 58
Amino acids, natural, book, 134
Aminocyclitols, natural, 58
Aminosugars, natural, 58
Amphiphiles, 22
	natural, recorcinol lipids, 30
Analysis, environmental, book, 142
	extraction, book, 150
	sampling, book, 149
	structure, book, 140
Anthocyanins, 71
Anthracyclones, preparation, 83
Anti-Alzheimer's agents, 44
Anti-arthritis agents, 44
Antifungal agents, book, 184
	natural, 10
Antisense agents, 17 
Antitumor agents, 8, 10, 25, 37-8, 44
	photosensitising, 49
Apomyoglobin, conformation helix, 2
Aroma chemistry, book, 174
Aromatics, biaryls, polycyclic, 119
	design, 118
	polycyclic, 119, 122
Aroyl-1,4-quinones, photocyclization, 83
Aryl ethers, preparation, 9
Arylamines, preparation, 9
Arylations, 9
Arylboronic acids, cross-coupling, book, 128
Asymmetric amplification, 18
Asymmetric catalysis, 18
Asymmetric synthesis, 18
	book, 155
	with physical fields, 26
ATP, bioenergetics, 12
	preparation, 13
Autocatalysis, 18
Azepine, furazan derivatives, 92
Azoles, book, 184
Azolides, in synthesis, book, 179
Benzoyl-1,4-benzoquinones, photocyclization, 83
Biaryls, from arylboronic acids, book, 128
Bicyclics, unsaturated, preparation, 108
Bicyclo[3.2.1]octanes, 31
Biocatalysts, antibodies, 84
	book, 181
Biochemistry, introductory, book, 153
Biological chemistry, book, 153, 178
Bioorganic chemistry, book, 182
	naphthazarins, 23
Biosynthesis, book, 134
Biotechnology, 36
Bipyridine, 4, 4'-, book, 167
Bleomycin, 25
Bridged hydrocarbons, unsaturated, preparation, 108
Cambridge structural database, 87 
Capillary electrophoresis, book, 143
Carbene complexes, 29
Carbocations, dicoordinated, book, 175
	intermediates, book, 175
Carbohydrates, book, 176
	from thiazole aldehydes, 113
	natural, book, 134
Carbonyls, reaction with chiral oxazaborolidine, 7
Carboxylic acids, activation, 81 
	reaction with pyrocarbonates, 81
Cardiovascular disease agents, 44
Catalysis, polarity-reversal, 55
	superacids, book, 171
Catenanes, 19
Centropolyindanes, 122
Chelates, 15
Chemometrics, book, 135
Chirality, with physical fields, 26
Chromatography, liquid, fullerenes, book, 157
	supercritical fluids, book, 177
Claisen Rearrangement, asymmetric, 56
Clinical trials, 51
Cocaine, transcription regulator, 100
Combinatorial catalysis, 43
Combinatorial chemistry, 21, 39-42, 52-3
	book, 183
Combinatorial libraries, 53
Compost, chemistry, book, 141
Computational chemistry, 20
Crystal structures, organic, 87
Crystallization, 123
Crystals, organic, book, 159
Cumulenylidene, transition metal complex, 29
Cyclic compounds, oligoquinanes, 121
Cycloaddition, with norbornadienes, book, 125
	book, 181
Cyclopentadienyl molybdenum compounds, book, 127
Cyclopentadienyl tungsten compounds, book, 127
Cyclopentenedione preparation, 107
Cyclophanes, carbon rich, 120
Cyclopropanes, derivatives, 111
Diamines, vicinal, 16
Diels-Alder reactions, book, 181
Dihydroquinones, para-, 80
Dimetallatriptycenes, 54
Diradicals, 20
DNA recognition, 17
DNA, bases, electron transfer, 104
Drug design, 42-3, 52
	screening, 40
Enzymes, single molecule, 98
Epothilones, 8
Epoxidation, asymmetric, book, 181
Ethers, reductive elimination, 5
Fatty acids, 70
	natural, book, 134
	plant, modification, 94
Flavonoids, 71
Fragrances, book, 174
Fullerenes, 14
	amine complexes, 88
	book, 138
	complexes, 88
	electrochemistry, 27
	liquid chromatography, book, 157
	metallocene complex, 88
	metalloporphyrin complex, 88
	separation, book, 157
	tetrathiafulvalene complex, 88
Fulvic acid, book, 141
Furanone preparation, by squarate ring expansion, 107
Furazans, derivatives, 92
General, book, 153-4
	delightful, book, 178
	demonstrations, book, 178
	laboratory book, 163
Glutaconic acids, 82
Glutaconic esters, 82
Glycosides, from thiazole aldehydes, 113
Grignard reagents, 54
Heteroanthracyclones, preparation, 83
Heterocycles, phosphorus-containing, 93
	saturated, book, 146
	solid phase preparation, 78
	synthesis, with cyclometals, book, 126
Heterogeneous catalysis, 22 
HIV virus, structure, 102
HIV-1 Reverse transcriptase, resistance, 96
Homogeneous catalysis, in supercritical fluids, 32
Host-guest complexes, 59
HPLC, derivatization, book, 165
	handbook, 161
Humic acid, alkylation, book, 141
Humic substances, book, 141
Hydrocylation, chelation-assisted, 110
Hydrogen abstraction, 55
Immunoradiotherapy, 37
Indole alkaloids, book, 133
Indolizidine alkaloids, 68
Intermediates, 20
Intermolecular forces, book, 169
Introductory chemistry, book, 178
Isoprenoids, 74
	book, 134
Isoquinoline alkaloids, book, 137
Jasmonates, 66
Ketones, enantioselective reduction, book, 172
Levulinic acid, 91
Lewis acid catalysts, lanthanide iodides, 62
Lewis acids, 15
Lignans, 76
Lipids, resorcinolic, 30
Liquid crystals, book, 159
Malononitrile, recyclisation reactions, 89
Mass spectrometry, book, 140 
	GC, book, 166
	LC, book, 168
Materials science, 21
Medicinal chemistry, book, 134
Mesopores, catalysis, 22
Metallacumulenes, 63
Metallocene catalysts, 50, 64
Metallocenes, 24
Methane, reforming, 61
Molecular chirality, quantitative probe, 99
Molecular dynamics, 20 
Molecular modeling, 42
Molecular recognition, 17
Molecular sieves, 22
Monosaccharide libraries, 53
Natural products chemistry, book, 134
Natural products, algae, 47
	aqueous, 47
	drugs, 46
	fungal, 47
	lithistid sponges, 10
	microbial, 47
	naphthazarins, 23
	nitrogen-containing, 58
	peroxy, 75
	plant, 66-7
Norbornadienes, cycloaddition, book, 125
Nuclear magnetic resonance, book, 140
Nucleic acids, 21
	nanostructures, 19
	polyamide, 17
Nucleosides, acyclic, book, 131
	carbocyclic, book, 131
	L-, book, 131
Olefins, hydroacylation, 110
	polymerization, 24, 64
Oligoquinanes, unsaturated, 121
Onium ions, book, 170
Organochromium complexes, 114
	asymmetric catalysis, 57
Organofluorine, chiral, preparation, 115
Organofullerenes, 27
Organolanthanides, book, 148
Organolithium compounds, 54
Organomagnesium compounds, 54
Organometallics, book, 148, 181
difunctional, 54
Organonickel complexes, book, 124
Organozinc reagents, book, 144
Oxidation, partial, catalysts, 86
Perfume chemistry, book, 174
Pesticides, book, 139
Pharmacophores, 42
Pheromones, book, 134
Phosphorylations, 12
Photodynamic therapy, 49
	tumors, 38
Physicochemical simulation, 42
Piperideine, 85
Plastics, recycling, 60
Polyacetylene, helical, 97
Polyamide nucleic acids, 17
Polyamides, book, 180
Polycycles, 14
	centropolyindanes, 122
	unsaturated, preparation, 108
Polyesters, 34
	book, 180
Polyethers, book, 180
Polyethylene, 50
Polyketides, book, 134
Polymerization, general, book, 180
	of self-organized assemblies, 6
Polymers, book, 159
	from supramolecules, 105
	fullerenes, 103
	heterocyclic, book, 180
	mesostructures, 103
	resin, book, 180
	rod-coil block copolymers, 103
	superadsorbant, 48
	supramolecular, 35, 101
Polymers, vinyl, book, 180
Polymorphism, crystal, 123
Polyolefins, 50
Polyphenolics, book, 151
Polypropylene, 50
Porphyrins, bacteriochlorins, book, 129
	chlorins, book, 129
	functionalized, by Wittig reactions, 109
	isobacteriochlorins, book, 129
	natural, book, 134
Propadienylcyclopropanes, 111
Protease inhibitors, design, 52
Protein folding, 2
	kinetics, 3
	transition state aggregation, 3
Protein refolding, laser induction, 1
Proteins, 21
	de novo design, 95
Pseudopeptides, from thiazole aldehydes, 113
Pyrans, furazan derivatives, 92
Pyridazines, functionalized, 65
Pyridines, furazan derivatived, 92
Quinazoline alkaloids, 69
Quinodimethanes, o-, book, 130
Quinoline alkaloids, 69
Quinolizidine alkaloids, 68
Quinones, para-, 80
Radical reactions, 15
Radicals, N-centered, book, 132
Receptors, polymeric, 59
Recycling waste, 45
Reductive eliminations, carbon-heteroatom, 5
Resorcinol, lipids, 30
Retro-Diels-Alder reaction, book, 172
Ruthenium-catalysts, 28
Selenium, chiral, catalysts, 117
Sesquiterpenoids, natural, 73
Solid phase synthesis, heterocycles, 78
Solvents, organic, book, 164
	supercritical fluids, 32-3
Spectroscopy, book, 140
Squarate  ring expansion, 107
Stereoselectivity, book, 173
Steroids, biosynthesis, 72
Stille reaction, book, 145
Structure-activity relationship, 52
Sulfides, reductive elimination, 5
Superacids, book, 171
Supercritical fluids, 20
Superoxide dismutase, 44
Surfactants, book, 160
Synthesis, book, 156, 158
	extreme conditions, book, 152
	in supercritical water, 33
	named reactions, book, 162
	stereoselective, book, 181
Synthons, amino group, 58
	holosynthon theory, 112
Terpenes, C5-C25, 77
	polyquinane, preparation, 112
Tetrahydropyridine, 85
Thin films, book, 159
Thiopyrans, furazan derivatives, 92
Tires, recycling, 60
Transition metals, organic synthesis, book, 136, 147
Trisulfane oxides, 79
Trisulfanes, 79
Triterpenoids, biosynthesis, 72
Tumors, photodynamic therapy, 38
Ulosonic acids, preparation, 113
Vesicles, biomimetics, 4
Viologens, book, 167
X-ray diffraction, polymorphic crystals, 123
